# Supplementary material for: A population of gut epithelial enterochromaffin cells is mechanosensitive and requires Piezo2 to convert force into serotonin release
Source: PubMed Central journal article supplement — Proc Natl Acad Sci U S A. 2018 Jul 23;115(32):E7632–41. doi: 10.1073/pnas.1804938115 (PMC6094143; doi:10.1073/pnas.1804938115), 2018-07-23
Supplement: pnas.1804938115.sapp.pdf [file pnas.1804938115.sapp.pdf]

## Supplementary Information for

### **A population of gut epithelial enterochromaffin cells is mechanosensitive and requires Piezo2 to convert force into serotonin release**

Constanza Alcaino,<sup>1</sup> Kaitlyn Knutson,<sup>1</sup> Anthony J. Treichel,<sup>1</sup> Gülcan Yildiz,<sup>1</sup> Peter R. Strege,<sup>1</sup> David R. Linden,<sup>1</sup> Joyce H. Li,<sup>2</sup> Andrew Leiter,<sup>2</sup> Joseph H. Szurszewski,<sup>1</sup> Gianrico Farrugia,<sup>1</sup> Arthur Beyder<sup>1</sup>

<sup>1</sup>Enteric Neuroscience Program, Division of Gastroenterology & Hepatology, Department of Physiology & Biomedical Engineering, Mayo Clinic, Rochester, Minnesota.

<sup>2</sup>Division of Gastroenterology, Department of Medicine, University of Massachusetts Medical School, Worcester, Massachusetts.

Corresponding Author:  
Arthur Beyder, M.D., Ph.D.  
Email: [beyder.arthur@mayo.edu](mailto:beyder.arthur@mayo.edu)

**This PDF file includes:**

Supplementary text  
Figs. S1 to S9  
Tables S1 to S2  
Movie captions S1 to S3  
References for SI reference citations

**Other supplementary materials for this manuscript include the following:**

Movies S1 to S3

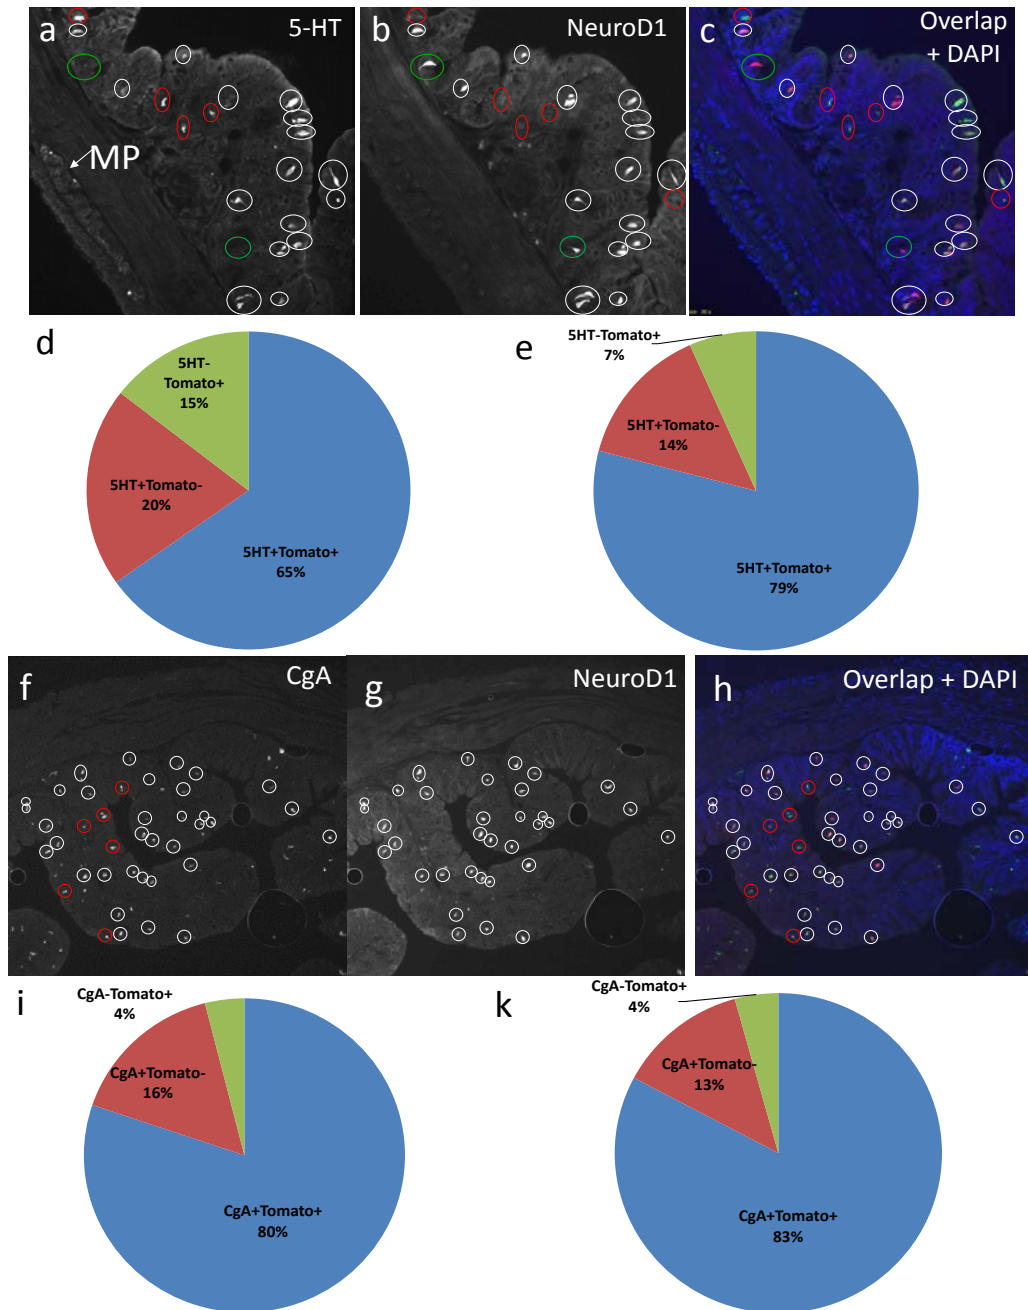

**Fig. S1. NeuroD1 is a specific marker of enterochromaffin (EC) cells and enteroendocrine (EE) cells.** **a-c, f-h** *NeuroD1-cre;GCaMP5-tdTomato (NeuroD1-GCaMP5)* mouse model epifluorescence images of **a-c**, transgenic tdTomato (NeuroD1) and immunolabeled serotonin (5-HT), or **f-h**, tdTomato (NeuroD1) and chromogranin A (CgA) from proximal colon of (10x magnification). Representative images of **a**, 5-HT and **b**, NeuroD1 cells (tdTomato+), and **c**, co-localization with nuclear labeling by DAPI. Serotonergic neurons in the myenteric plexus (MP) are tdTomato-. Quantification of 5-HT and tdTomato co-localization in **d**, small bowel and **e**, colon. Representative images of **f**, immunolabeled CgA and **g**, NeuroD1 cells (tdTomato+) and **h**, co-localization with nuclear labeling by DAPI. Quantification of overlap in **i**, small bowel and **k**, colon. White circles are around cells that are CgA and tdTomato co-localization (white circles), CgA or 5-HT only (red circles), NeuroD1 only (green circle).

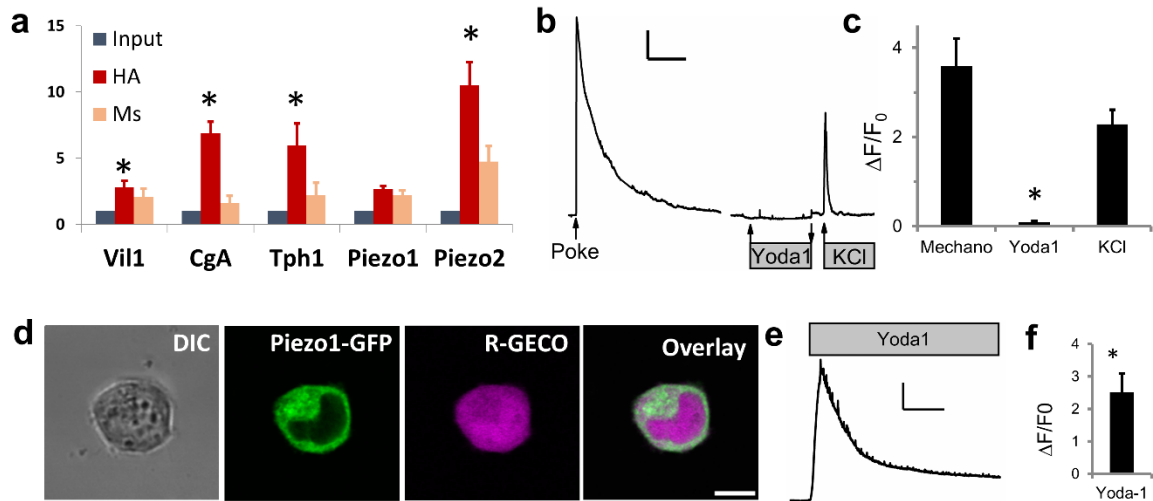

**Fig. S2. Piezo1 is not expressed and not functionally relevant in NeuroD1+ cells.** **a**, Expression (mRNA) profiles in *NeuroD1-cre;RiboTag* mouse model using qRT-PCR of epithelium (Input, blue), HA affinity purification (HA, red), and non-targeted mouse IgG control (Ms, brown). Based on expression, the HA-purified samples are enriched (HA/Input) for epithelial marker *Villin1* (*Vil1*) (HA/Input  $2.8 \pm 0.5$ ,  $*P < 0.05$ ), for EC cell genes Chromogranin A (*CgA*) (HA/Input  $6.9 \pm 0.9$ ,  $*P < 0.05$ ) and Tryptophan hydroxylase 1 (*Tph1*) (HA  $6.0 \pm 1.6$ ,  $*P < 0.05$ ), and for *Piezo2* (HA/Input  $10.5 \pm 1.8$ ,  $*P < 0.05$ ), but not for *Piezo1* (HA/Input  $2.7 \pm 0.2$ ,  $P > 0.05$ ) (N=3 mice). **b**, Representative NeuroD1+ cell  $Ca^{2+}$  response to direct Mechano stimulation (Poke), followed by 10  $\mu M$  Yoda1 (1), and 50 mM KCl (scale bars 100 sec,  $\Delta F/F_0$  0.5). **c**, Mean  $\pm$  SEM  $\Delta F/F_0$  responses in the same cells to mechanical stimulation ( $3.60 \pm 0.62$ ), 10  $\mu M$  Yoda1 ( $0.10 \pm 0.03$ ), 50 mM KCl ( $2.29 \pm 0.32$ ) (n=5,  $*P < 0.05$  for Yoda1 compared to Mechano by paired t-test). **d**, Live, confocal image of a HEK cell (DIC) transiently transfected with Piezo1-GFP (courtesy Dr. Philip Gottlieb, SUNY Buffalo), red calcium indicator R-GECO (courtesy Dr. Fouad Chebib, Mayo Clinic) and overlaid images. Scale bar, 10  $\mu m$ . **e**, Representative Piezo1-GFP HEK cell  $\Delta F/F_0$  R-GECO response to 10  $\mu M$  Yoda1 (scale bars 100 sec,  $\Delta F/F_0$  0.5). **f**, Mean  $\pm$  SEM  $\Delta F/F_0$  R-GECO responses to Yoda1 in Piezo1-GFP HEK cells (n=14,  $2.51 \pm 0.57$ ,  $*P < 0.05$  compared to bath exchange by paired t-test).

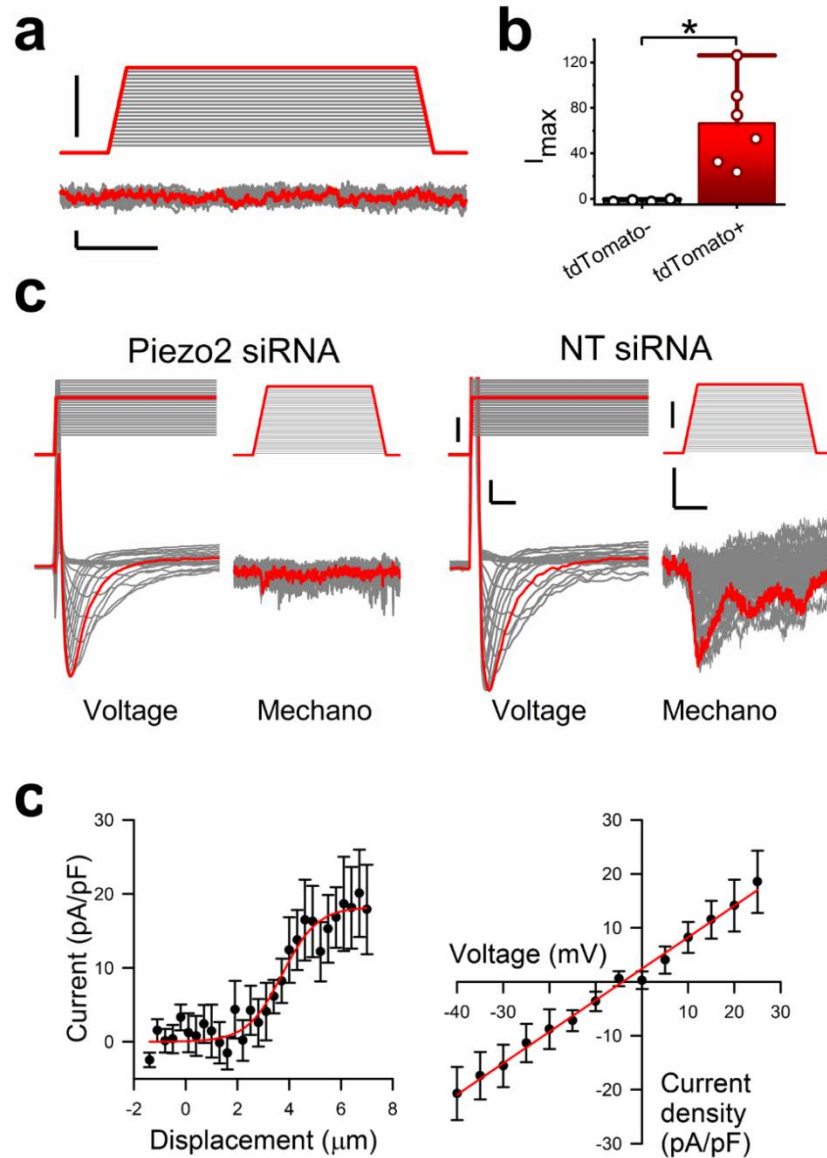

**Fig. S3. Non-fluorescent and NeuroD1+ cell electrophysiology controls and analyses.** The experiments were performed in primary cultures from *NeuroD1-cre;GCaMP5-tdTomato* mouse. **a**, on the left is a representative whole cell voltage-clamp (holding potential -70 mV) mechanostimulation experiment in tdTomato negative non-fluorescent cell. Graded increase in cell membrane deformation (top, 0.3  $\mu\text{m}/\text{step}$ ) did not result in mechanosensitive currents in these cells (Scale bars 5  $\mu\text{m}$  [top], 20 msec, 10 pA [bottom]). **b**, Mean  $\pm$  SEM peak mechanosensitive whole cell current in non-fluorescent (tdTomato-) cells ( $-1.6 \pm 0.6$  pA,  $n=4$ ) is significantly smaller than NeuroD1+ cells (tdTomato+) (data from Figure 3,  $66.5 \pm 15.7$  pA,  $n=6$ ) ( $*P < 0.05$  by non-paired t-test). **c** and **d** show that Piezo2 siRNA-treated NeuroD1+ EE cells maintain voltage-dependent  $\text{Na}_v$  currents (2, 3) but lose mechanosensitive currents. Representative NeuroD1+ tdTomato EE cell voltage-dependent  $\text{Na}_v$  currents (left panels) and mechanosensitive currents (right panels) for **c**, Piezo2 siRNA, and **d**, NT siRNA. Scale bars are 1 msec, 50 pA for left panels and 20 msec, 20 pA for right panels. **e-f**, Capacitance normalized **e**, current-displacement relationships and **f**, voltage-dependence of mechano-sensitive currents at max membrane displacement.

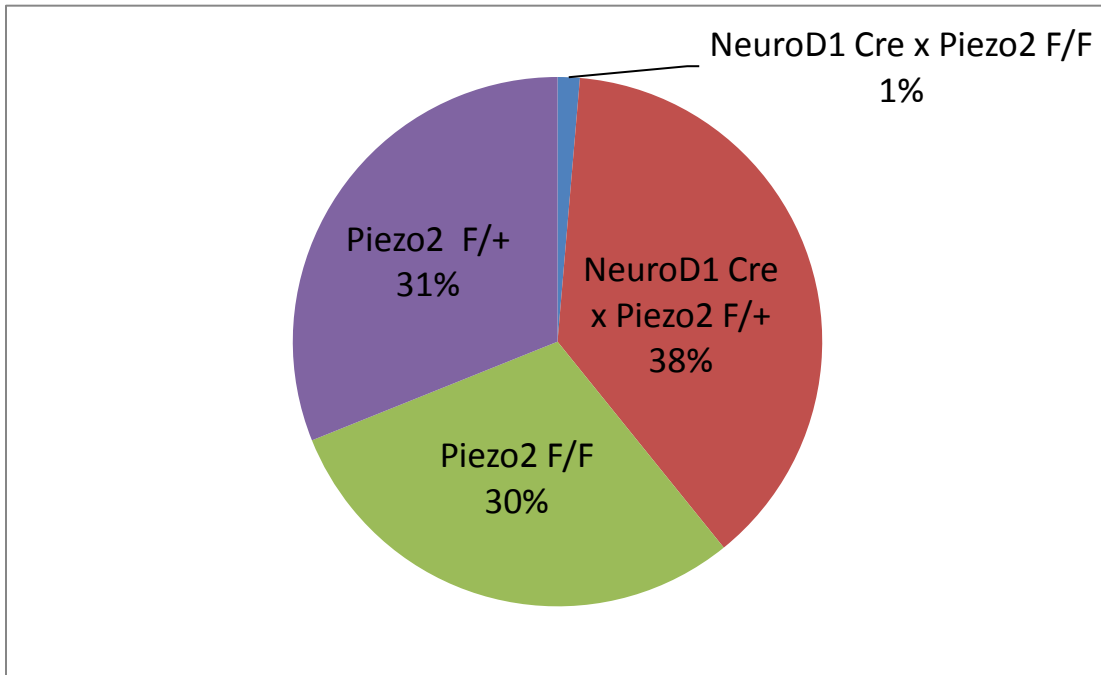

**Fig. S4. *NeuroD1-cre*;*Piezo2*<sup>ff</sup> is a lethal phenotype (n=74 mice).** In an attempt to create cell-specific knockout, we mated the *Piezo2*<sup>f/f</sup> mice with *NeuroD1-Cre*;*Piezo2*<sup>f/+</sup> mice. Pie chart showing the offspring had the following genotypes: purple *Piezo2*<sup>f/+</sup> (31%, purple), *Piezo2*<sup>f/f</sup> (30%, green), red *NeuroD1-Cre*;*Piezo2*<sup>f/+</sup> (38%, red) and *NeuroD1-Cre*;*Piezo2*<sup>f/f</sup> (1%, blue).

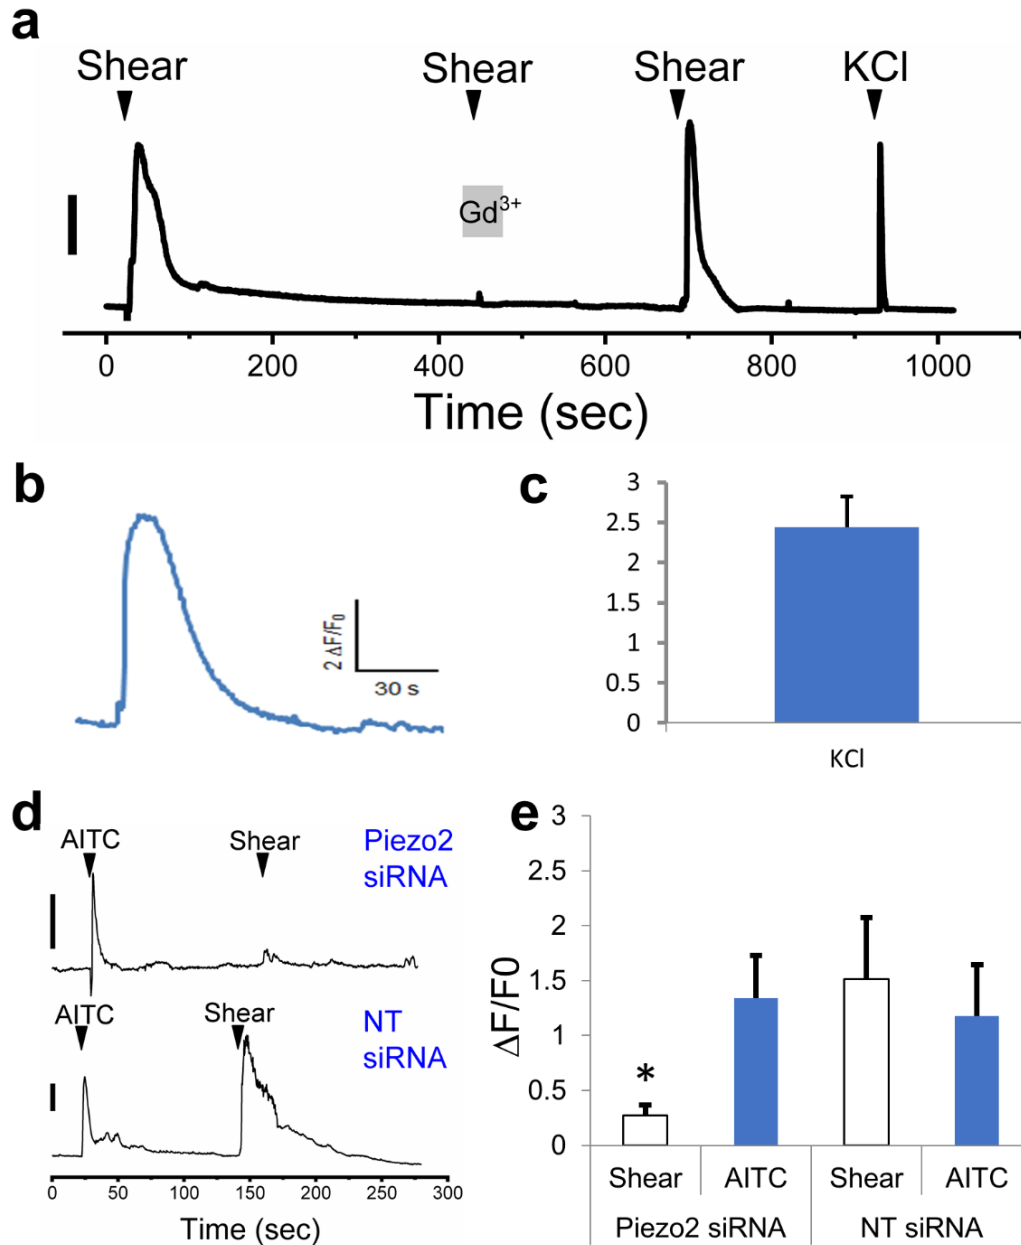

**Fig. S5. Calcium imaging NeuroD1+ controls in primary cultures from *NeuroD1-cre;GCaMP5-tdTomato* mouse.** **a**, Representative trace showing full experiment for  $\Delta F/F_0$  with Shear, followed by  $Gd^{3+}$  (grey bar) with Shear, washout (Shear) and 50 mM KCl. Scale bar (1  $\Delta F/F_0$ ). **b**, Representative control  $\Delta F/F_0$  response to 50 mM KCl, and **c**, Mean $\pm$ SEM  $\Delta F/F_0$  responses for application of 50 mM KCl ( $\Delta F/F_0 = 2.6 \pm 0.7$ ,  $n=4$ ). **d** & **e**, TRPA1 agonist (150  $\mu$ M AITC) and Shear responses in Piezo2 siRNA and NT siRNA NeuroD1+ cells, with **d**, representative responses (Scale bars 0.5  $\Delta F/F_0$ ) and **e**, Mean $\pm$ SEM  $\Delta F/F_0$  responses for Piezo2 siRNA treated cells ( $\Delta F/F_0$  Shear:  $0.3 \pm 0.1$ ,  $n=6$ ;  $\Delta F/F_0$  and AITC:  $1.34 \pm 0.38$ ,  $n=6$ ;  $*P < 0.05$  for shear vs AITC) and NT siRNA treated cells ( $\Delta F/F_0$  Shear:  $1.67 \pm 0.7$ ,  $n=5$  and AITC:  $1.2 \pm 0.46$ ,  $n=5$ ;  $P > 0.05$  for shear vs AITC).



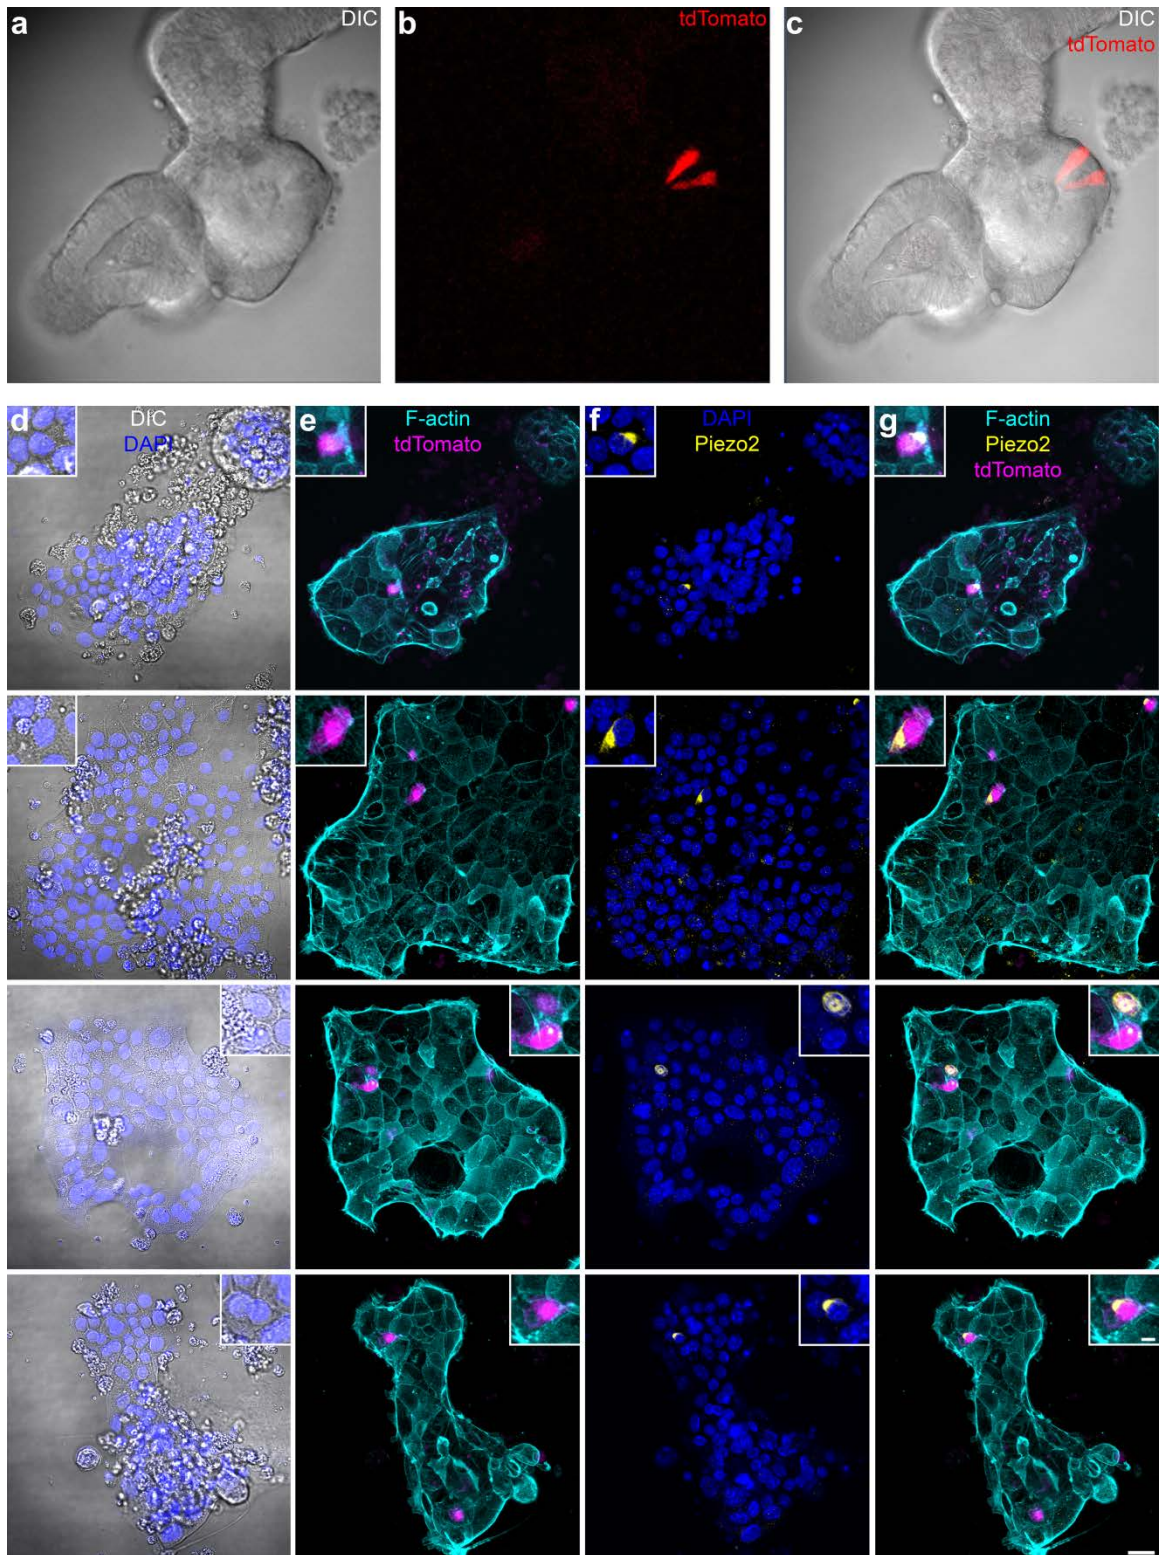

**Fig. S6. Planarization of *NeuroD1-cre;GCaMP5-tdTomato* mouse intestinal organoids.** **a**, DIC image of a 3-day old organoid with **b**, tdTomato+ EC cells, and **c**, co-localization DIC and tdTomato. Four representative planarized organoids columns in **d**, DIC with DAPI to label nuclei, **e**, tdTomato and phalloidin to label f-actin, **f**, Piezo2 immunolabeling, and **g**, co-localization. Scale bars = 20  $\mu\text{m}$  (**d-g**) and 5  $\mu\text{m}$  (insets).



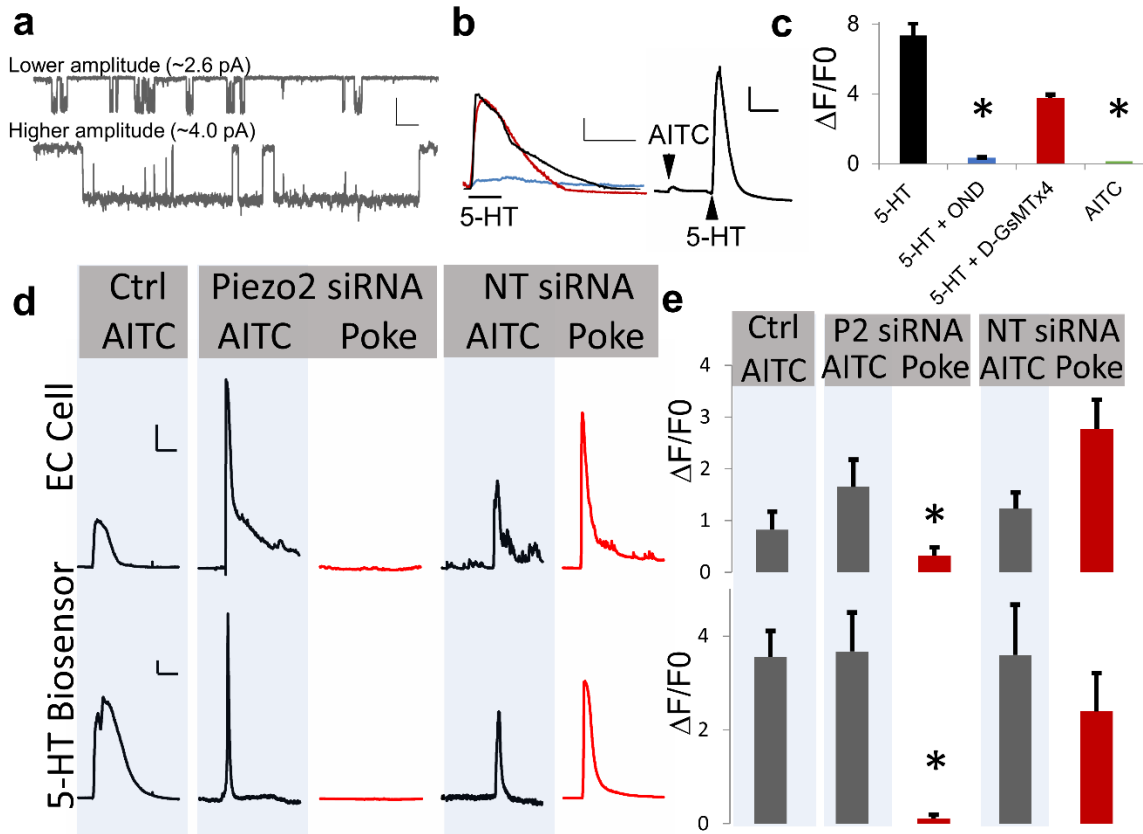

**Fig. S7. Serotonin (5-HT) biosensor controls.** **a**, Representative traces of cell-attached patches of HEK293 cells expressing genetically modified high-conductance non-inactivating 5-HT<sub>3</sub> receptors.(4) Pipettes contained 1 μM 5-HT and two amplitudes (~2.6 pA and ~4.0 pA) were found, as previously described.(4)(Scale bars 2pA, 100 msec) **b-c**, Calcium imaging controls from 5-HT<sub>3</sub>R biosensor cells. **b**, Representative traces showing Ca<sup>2+</sup> (GCaMP5) ΔF/F<sub>0</sub> control responses to (left) 20 sec application of 10 μM 5-HT in absence (black) and presence of 10 μM D-GsMTx4 (red) or 0.1 μM Ondansetron (OND, blue trace). Scale bars, 2 ΔF/F<sub>0</sub>, 30 sec. On right, 150 μM AITC followed by 10 μM 5-HT (scale bars 100 sec, 0.5 ΔF/F<sub>0</sub>). **c**, Mean±SEM ΔF/F<sub>0</sub> responses to 5-HT (black, 7.3±0.7 ΔF/F<sub>0</sub>, n=9), 5-HT+Ondansetron (blue, 0.4±0.03 ΔF/F<sub>0</sub>, n=11, \*P<0.05 compared to 5-HT, unpaired t-test), 5-HT+D-GsMTx4 (red, 3.8±0.2 ΔF/F<sub>0</sub>, n=11, P>0.05 compared to 5-HT, unpaired t-test), and AITC (green, 0.1±0.02 ΔF/F<sub>0</sub>, n=6, \*P<0.05 compared to 5-HT by paired t-test). **d-e**, siRNA control Ca<sup>2+</sup> responses in NeuroD1+ EC cells (top traces and bars) from *NeuroD1-cre;GCaMP5-tdTomato* mouse primary cultures and 5-HT biosensor cells (bottom traces and bars). **d**, Representative NeuroD1+ EC cell and 5-HT biosensor cell responses, showing that chemical activation of TRPA1 by 150 μM AITC results in NeuroD1+ EC cell intracellular Ca<sup>2+</sup> increase (ΔF/F<sub>0</sub>) and 5-HT release from NeuroD1+ EC control (untreated) cells, Piezo2 siRNA treated, and NT siRNA treated NeuroD1+ EC cells. In the same NeuroD1+ EC cells, poke responses and 5-HT release occur only from NeuroD1+ EC cell controls and NT siRNA but not Piezo2 siRNA. Scale bars for top and bottom traces, 0.5 ΔF/F<sub>0</sub>, 3 sec. **e**, Mean±SEM for NeuroD1+ EC and 5-HT biosensor cells for control (AITC: ΔF/F<sub>0</sub> EC cell: 0.8±0.4, n=7; ΔF/F<sub>0</sub> biosensor: 3.6±0.6, n=13), and AITC and poke in the same NeuroD1+ EC Piezo2 siRNA treated cells (AITC: ΔF/F<sub>0</sub> EC cell: 1.7±0.5, n=5; ΔF/F<sub>0</sub> biosensor: 3.7±0.8, n=5; Poke: ΔF/F<sub>0</sub> EC cell: 0.3±0.2, n=5; ΔF/F<sub>0</sub> biosensor: 0.1±0.1, n=5), and NeuroD1+ EC NT siRNA treated cells (AITC: ΔF/F<sub>0</sub> EC cell: 1.2±0.3, n=5; ΔF/F<sub>0</sub> biosensor: 3.6±1.1, n=5; Poke: ΔF/F<sub>0</sub> EC cell: 2.8±0.6, n=5; ΔF/F<sub>0</sub> biosensor: 2.4±0.8, n=5). AITC: P>0.05 for Piezo2 siRNA vs NT siRNA. Poke: \*P<0.05 for Piezo2 siRNA vs. NT siRNA for EC and biosensor cells.

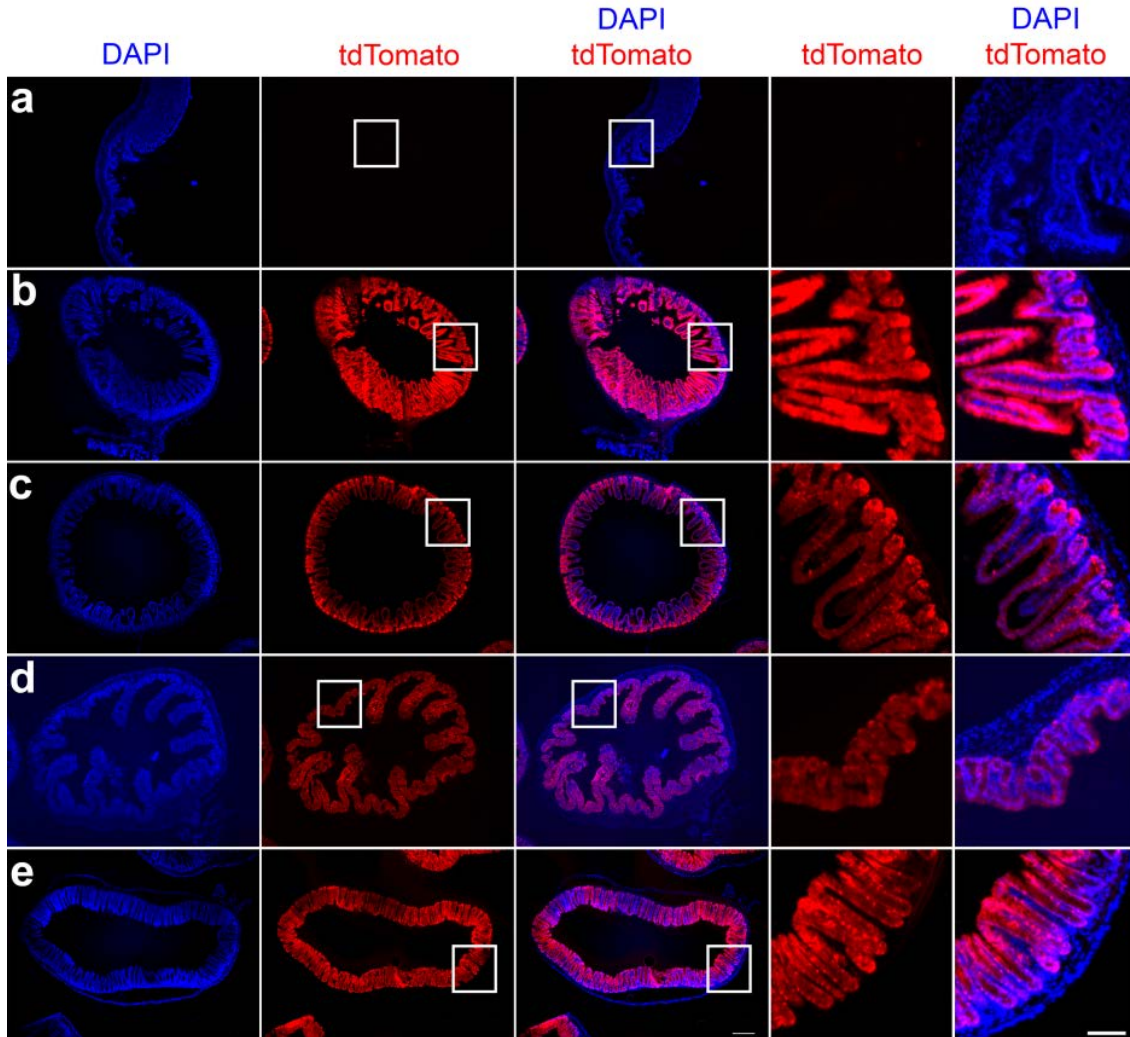

**Fig. S8. Villin is expressed specifically in all epithelial cells of small and large bowel, but not stomach.** Validation of the Villin-cre (*Vil-cre*) model using *Vil-cre;Ai9(tdTomato)* mouse model. Villin was **a**, not expressed in the stomach, but expressed in **b**, duodenum, **c**, jejunum, **d**, proximal colon and **e**, distal colon. Right two columns are enlarged sections in the white rectangles. Scale bars = 200  $\mu\text{m}$  (**a-e**) and 75  $\mu\text{m}$  (insets).

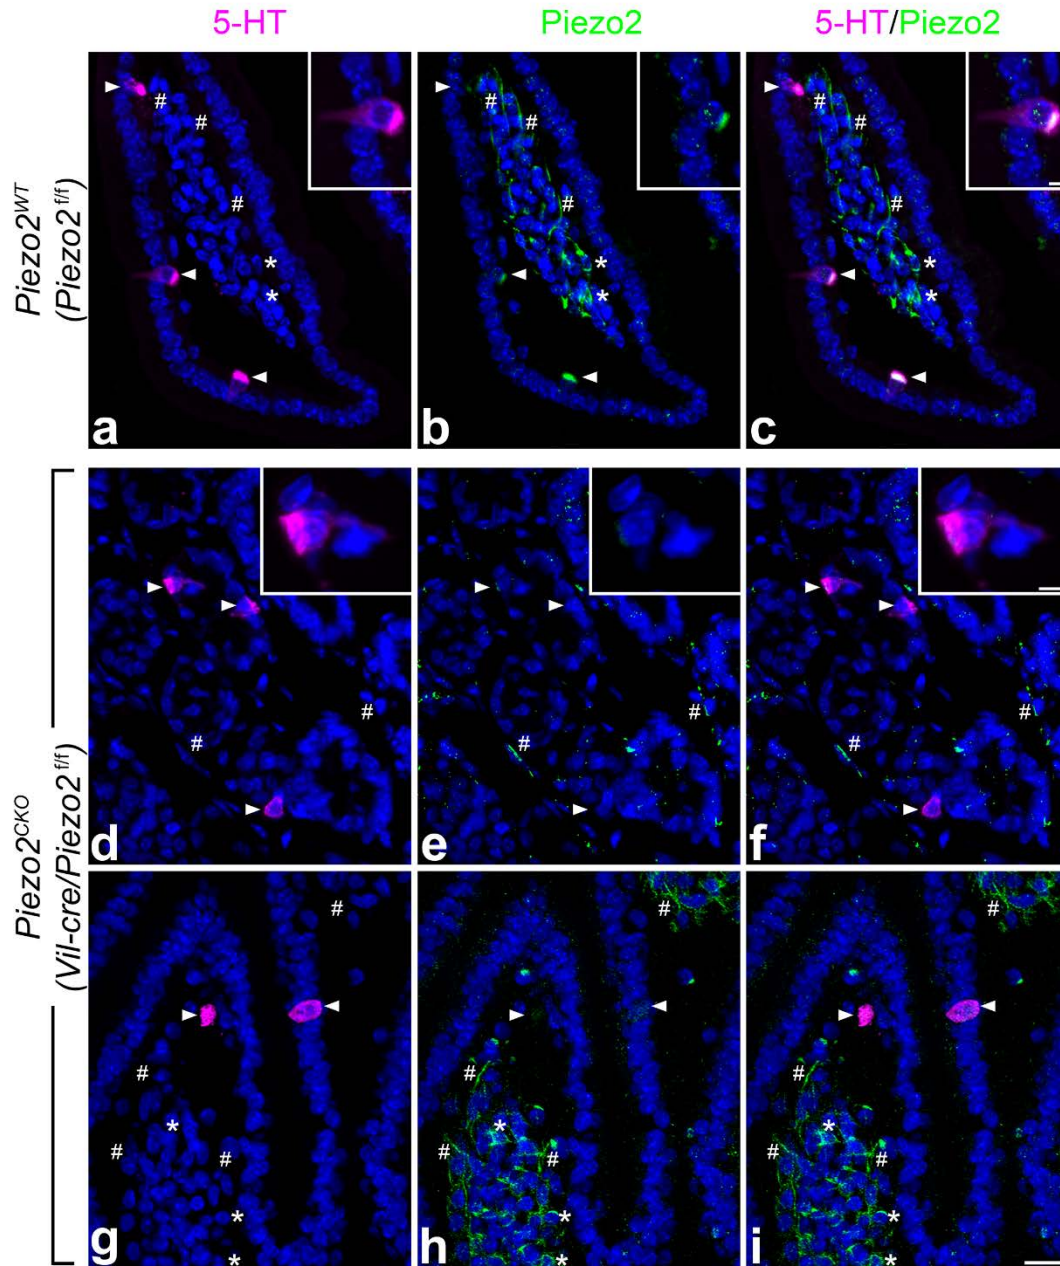

**Fig. S9. Validation of gut epithelium conditional Piezo2 knock out knockout mouse model *Piezo2<sup>CKO</sup> (Vil-cre;Piezo2<sup>fl/fl</sup>)* using immunolabeling and confocal microscopy.** In control *Piezo2<sup>WT</sup> (Piezo2<sup>fl/fl</sup>)* small bowel, DAPI (blue, nuclei), and immunolabeling of **a**, 5-HT (magenta), **b**, Piezo2 (green) and **c**, Co-localization of 5-HT and Piezo2 in 2 of 3 EC cells (arrows). Inset shows a representative 5-HT+ Piezo2+ EC cell. In the subepithelial space (lamina propria), there are Piezo2+ 5-HT- cell bodies (\*) and fibers (#) that may represent neurons and their processes, respectively. **d-i**, In *Piezo2<sup>CKO</sup> (Vil-cre;Piezo2<sup>fl/fl</sup>)*, with DAPI (blue, nuclei) and immunolabeling of **d,g**, 5-HT (magenta), **e,h**, Piezo2 (green) and **f,i**, Co-localization of 5-HT and Piezo2. These images show that in 5-HT+ EC cells (arrows) Piezo2 is absent. Typical 5-HT+ Piezo2- EC cell shown in inset. In the subepithelial space (lamina propria), there remain Piezo2+ 5-HT- cell bodies (\*) and fibers (#) that may represent neurons and their processes, respectively. Scale bars = 20  $\mu\text{m}$  (**a-i**) and 5  $\mu\text{m}$  (insets).

**Table S1.** PCR primers used in this study.

| <b>Primer Sequence (5'-3')</b> |                                    |                                       |                             |                                        |                     |
|--------------------------------|------------------------------------|---------------------------------------|-----------------------------|----------------------------------------|---------------------|
|                                | <b>Forward</b>                     | <b>Reverse</b>                        | <b>Amplicon Length (bp)</b> | <b>Paper or Company</b>                | <b>Species</b>      |
| <b>GAPDH</b>                   | -                                  | -                                     | 140                         | Qiagen                                 | <i>Mus musculus</i> |
| <b>HPRT1</b>                   | TGGATAC<br>AGGCCA<br>GACTTTG<br>TT | CAGATTC<br>AACTTGC<br>GCTCATC         | 124                         | (5)                                    | <i>Mus musculus</i> |
| <b>Vil1</b>                    | TGGAGG<br>AGGAGG<br>ATGTGTT<br>C   | GGGTCTC<br>AAGGTCT<br>CGGTTT          | 150                         | (6)                                    | <i>Mus musculus</i> |
| <b>CgA</b>                     | CCAAGGT<br>GATGAA<br>GTGCGTC       | GGTGTCG<br>CAGGATA<br>GAGAGGA         | 129                         | (7)                                    | <i>Mus musculus</i> |
| <b>NeuroD1</b>                 | AGGAATT<br>CGCCCAC<br>GCAGAA       | TGGTCATG<br>TTTCCACT<br>TCCTGTTG<br>T | 101                         | Joyce Li, University of Massachusetts. | <i>Mus musculus</i> |
| <b>Tph1</b>                    | TGTTGAC<br>TGCGACA<br>TCAGCCG<br>A | GGAAACC<br>AAGGGAC<br>AGTCTCCA        | 138                         | Origene                                | <i>Mus musculus</i> |
| <b>Piezo2</b>                  | GCACTCT<br>ACCTCAG<br>GAAGAC<br>TG | CAAAGCT<br>GTGCCAC<br>CAGGTTCT        | 140                         | Origene                                | <i>Mus musculus</i> |
| <b>Piezo2<sup>#</sup></b>      | CTTGTGA<br>GGTCGG<br>GTGGT         | ATGAGGG<br>GATGGGG<br>AGAG            | 198                         | (8)                                    | <i>Mus musculus</i> |
| <b>Piezo1</b>                  | -                                  | -                                     | 83                          | Qiagen                                 | <i>Mus musculus</i> |

**Table S2. Antibodies used in this study.**

| <b>Antibody</b>                                  | <b>Type</b> | <b>Titre/Concentration</b>                  | <b>Source</b>     | <b>Catalog #</b>           | <b>Lot #</b>               |
|--------------------------------------------------|-------------|---------------------------------------------|-------------------|----------------------------|----------------------------|
| <b>Rbt <math>\alpha</math> Piezo2</b>            | polyclonal  | 1:2000 (cryosections),<br>1:500 (organoids) | A. Patapoutian    | Not commercially available | Not commercially available |
| <b>Alexa Fluor 488-Phalloidin</b>                | N/A         | 1:40/5 Units/mL                             | Life Technologies | A12379                     | 1785486                    |
| <b>Gt <math>\alpha</math> 5-HT (serotonin)</b>   | polyclonal  | 1:2000 (manufacturers stock)                | abcam             | Ab66047                    | GR12110-19                 |
| <b>Gt <math>\alpha</math> Chromogranin A</b>     | polyclonal  | 1:500/0.4 $\mu$ g/mL                        | Santa Cruz        | Sc-1488                    | F0716                      |
| <b>Alexa Fluor 647-<math>\alpha</math> HA</b>    | monoclonal  | 1:50/10 $\mu$ g/mL                          | BioLegend         | 682404                     | B218119                    |
| <b>Alexa Fluor 568-Dk <math>\alpha</math> Gt</b> | polyclonal  | 1:800/2.5 $\mu$ g/mL                        | Invitrogen        | A11057                     | 1711491                    |
| <b>Cy5-Dk <math>\alpha</math> Gt</b>             | polyclonal  | 1:500/3 $\mu$ g/mL                          | Jackson           | 705-175-147                | 117079                     |
| <b>Cy5 Dk <math>\alpha</math> Rbt</b>            | polyclonal  | 1:500/3 $\mu$ g/mL                          | Jackson           | 711-175-152                | 120907                     |



**Movie S1. Shear stress increases EC cell intracellular  $\text{Ca}^{2+}$ .**

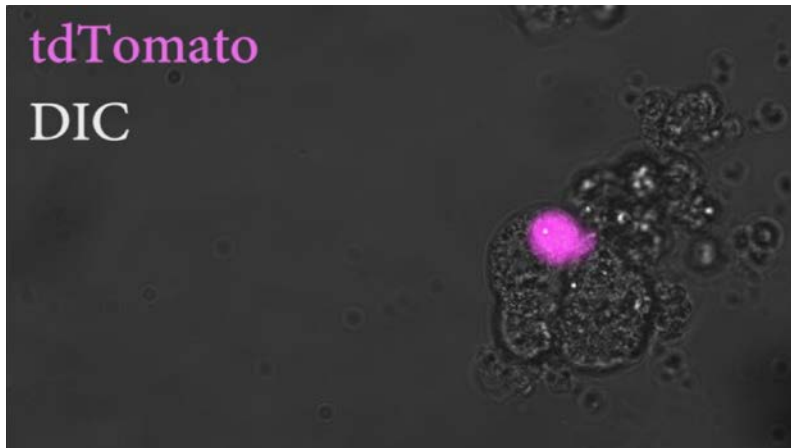

**Movie S2. EC cells within planarized intestinal organoids are mechanosensitive.**

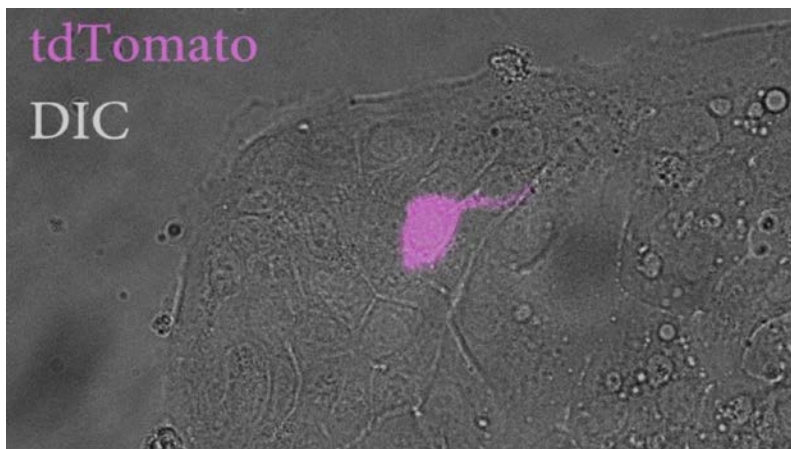

**Movie S3. Mechanosensitive EC cells release 5-HT in response to membrane displacement.**

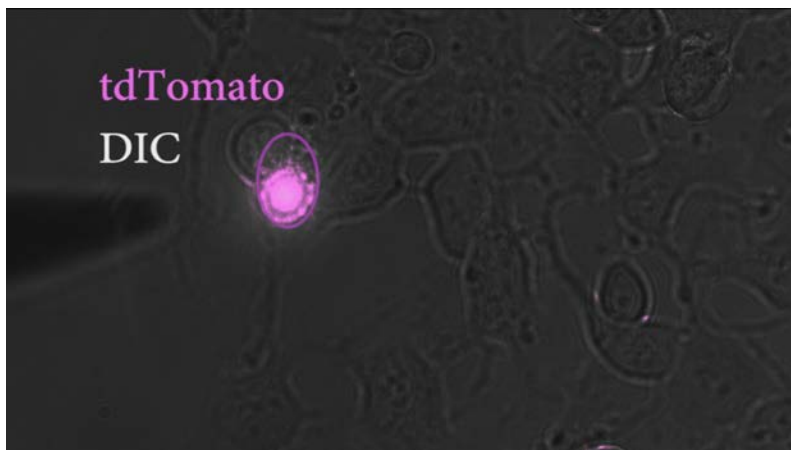



## References

1. Syeda R, *et al.* (2015) Chemical activation of the mechanotransduction channel Piezo1. *eLife* 4.
2. Strege PR, *et al.* (2017) Sodium channel NaV1.3 is important for enterochromaffin cell excitability and serotonin release. *Sci. Rep.* 7(15650).
3. Bellono NW, *et al.* (2017) Enterochromaffin Cells Are Gut Chemosensors that Couple to Sensory Neural Pathways. *Cell* 170(1):185-198 e116.
4. Corradi J, Gumilar F, & Bouzat C (2009) Single-channel kinetic analysis for activation and desensitization of homomeric 5-HT(3)A receptors. *Biophys. J.* 97(5):1335-1345.
5. Wang F, Wang J, Liu D, & Su Y (2010) Normalizing genes for real-time polymerase chain reaction in epithelial and nonepithelial cells of mouse small intestine. *Anal. Biochem.* 399(2):211-217.
6. Sirakov M, Borra M, Cambuli FM, & Plateroti M (2013) Defining suitable reference genes for RT-qPCR analysis on intestinal epithelial cells. *Mol. Biotechnol.* 54(3):930-938.
7. Santana MM, *et al.* (2015) Impaired adrenal medullary function in a mouse model of depression induced by unpredictable chronic stress. *Eur. Neuropsychopharmacol.* 25(10):1753-1766.
8. Maksimovic S, *et al.* (2014) Epidermal Merkel cells are mechanosensory cells that tune mammalian touch receptors. *Nature* 509(7502):617-621.
